# Supplementary material for: Vasa Vasorum Densities in Human Carotid Atherosclerosis Is Associated with Plaque Development and Vulnerability
Source: PubMed Central journal article supplement — J Korean Neurosurg Soc. 2019 Aug 9;63(2):178–87. doi: 10.3340/jkns.2019.0077 (PMC7054111; doi:10.3340/jkns.2019.0077), 2019-08-09
Supplement: jkns-2019-0077-supple1.pdf [file jkns-2019-0077-supple1.pdf]

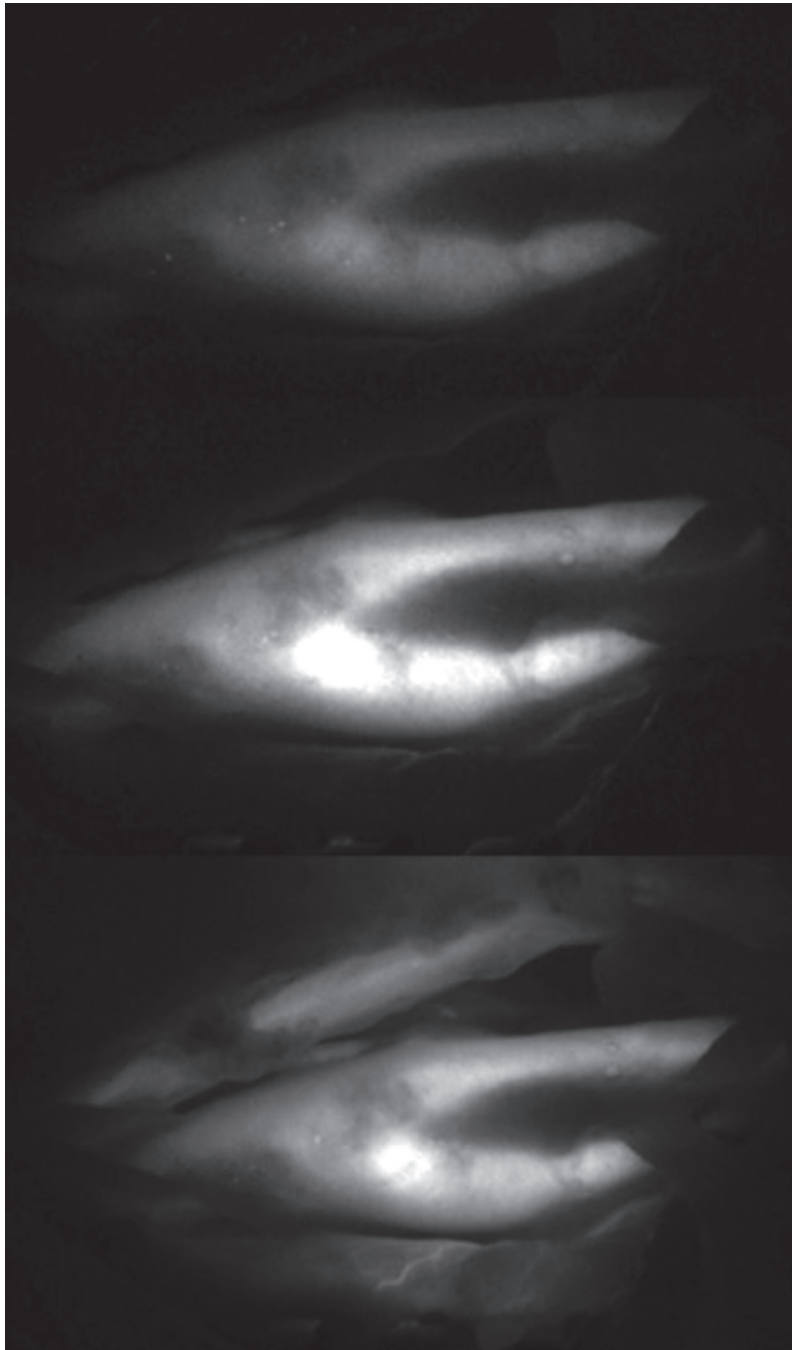

**Supplementary Fig. 1.** Indocyanine green video angiography (ICG-VA) findings of a control patient. No vasa vasorum activity was seen on the carotid artery.
