# Supplementary material for: Vasa Vasorum Densities in Human Carotid Atherosclerosis Is Associated with Plaque Development and Vulnerability
Source: PubMed Central journal article supplement — J Korean Neurosurg Soc. 2019 Aug 9;63(2):178–87. doi: 10.3340/jkns.2019.0077 (PMC7054111; doi:10.3340/jkns.2019.0077), 2019-08-09
Supplement: jkns-2019-0077-supple4.pdf [file jkns-2019-0077-supple4.pdf]

**Supplementary Table 1.** Angiographic, intraoperative findings of plaque and their relationship

|                             | VVE | VVI    | <i>p</i> -value |
|-----------------------------|-----|--------|-----------------|
| I. Angiographic instability |     |        |                 |
| Stable                      | 2   | 39     | 0.005           |
| Unstable                    | 9   | 18     |                 |
| II. Plaque vulnerability    |     |        |                 |
| Stable                      | 1   | 29     | 0.017           |
| Unstable                    | 10  | 28     |                 |
| Agreement between I & II    |     | 80.60% |                 |

VVE : vasa vasorum externa, VVI : vasa vasorum interna
